# Supplementary material
Source: Springer Nature journal article supplement (https://www.springermedizin.de/resource/supplementary/12906_2013_1747_MOESM5_ESM.pdf/9522660)
Supplement: MOESM5 [file 9522660]

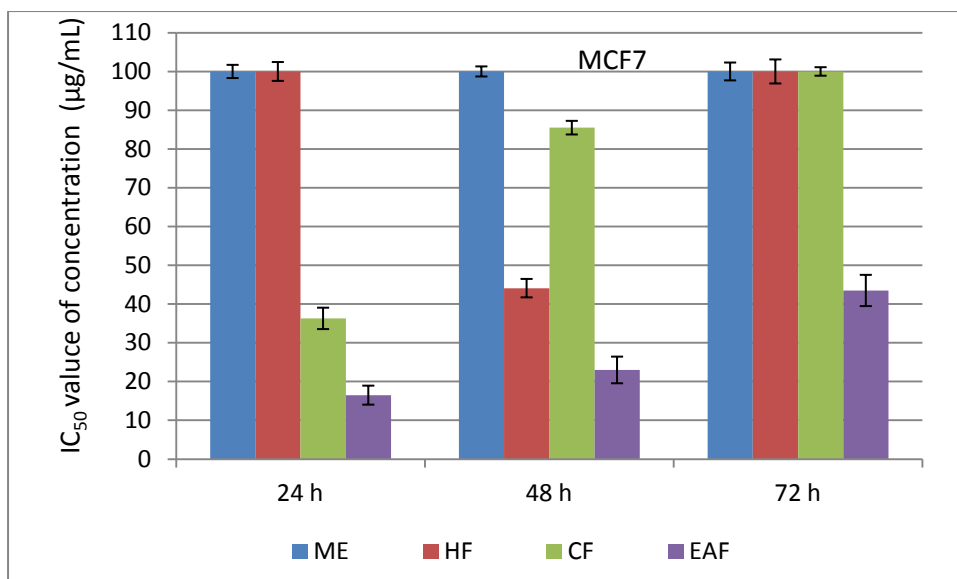

Each value is expressed as mean  $\pm$  standard deviation of three measurements.

Figure 5: *In vitro*, cytotoxic effects of methanolic extract, ethyl acetate fraction, hexane fraction, chloroform fraction and water fraction of *Phaleria macrocarpa* (Scheff.) boerl fruits on MCF7 breast cancer cells line. Cells were treated with various concentrations of extract and all fractions for 24 h, 48 h and 72h prior to the determination of cytotoxicity by MTT cell proliferation assay.
